# Supplementary material for: The effect of inhibition of receptor tyrosine kinase AXL on DNA damage response in ovarian cancer
Source: PubMed Central journal article supplement (PMC10287694; doi:10.1038/s42003-023-05045-0), 2023-06-22
Supplement: 42003_2023_5045_MOESM3_ESM.pdf [file 42003_2023_5045_MOESM3_ESM.pdf]

## Description of Additional Supplementary Files

**File name:** Supplementary Data

**Description:** All source data underlying the graphs and charts presented in the main figures.
