# Supplementary material for: The effect of inhibition of receptor tyrosine kinase AXL on DNA damage response in ovarian cancer
Source: Commun Biol. 2023 Jun 22;6:660. doi: 10.1038/s42003-023-05045-0 (PMC10287694; doi:10.1038/s42003-023-05045-0)
Supplement: Supplementary file 2 — Supplementary Information [file 42003_2023_5045_MOESM2_ESM.pdf]

**Supplementary figure 1: AXL inhibition associated with downregulation of cell cycle, mitosis and DNA replication**

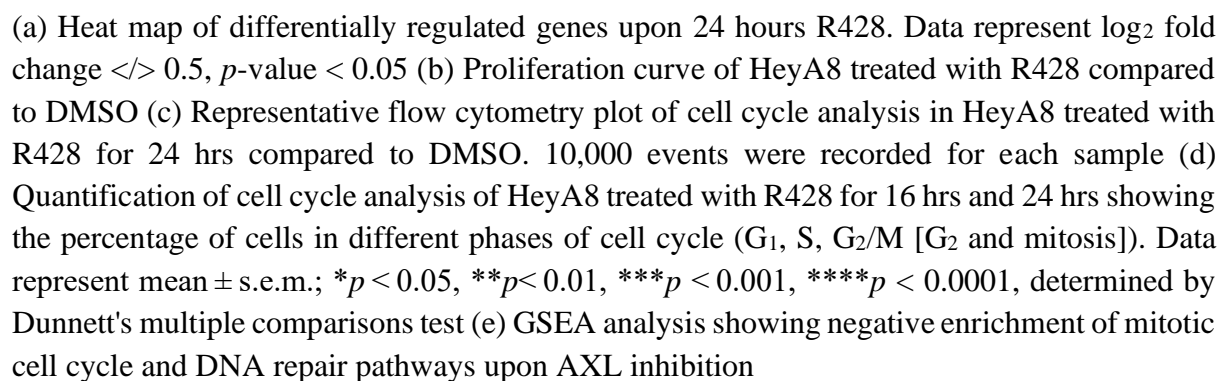

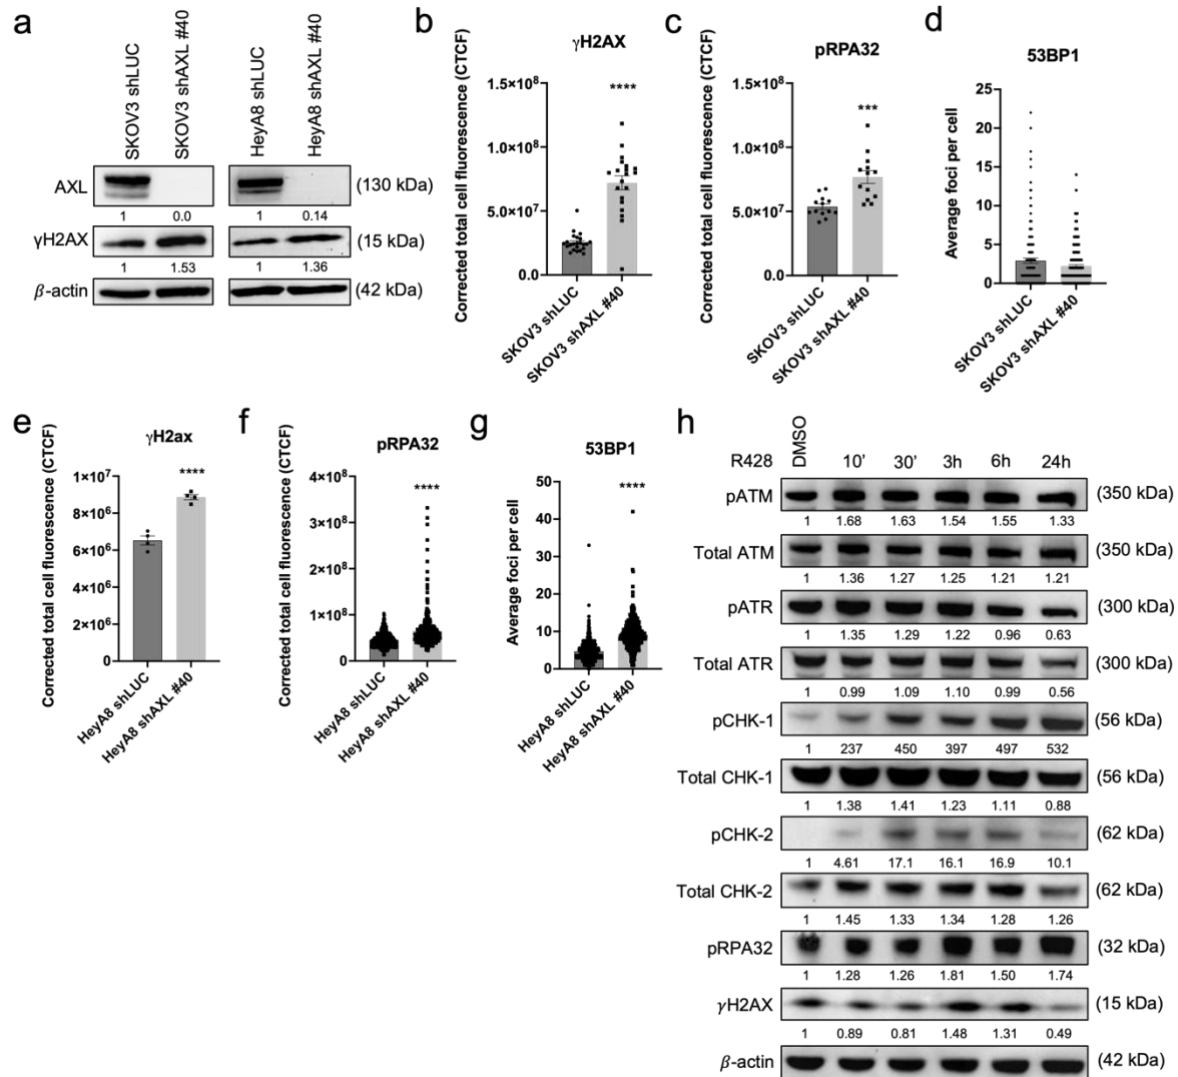

## Supplementary figure 2: AXL inhibition increases DNA damage and DNA damage response pathways

(a) AXL knockdown in SKOV3 and HeyA8 (b) Fluorescence intensity quantification of  $\gamma$ H2AX in SKOV3 shLUC Vs shAXL #40 (c) Fluorescence intensity quantification of pRPA32 in SKOV3 shLUC Vs shAXL #40 (d) Foci quantification of 53BP1 in SKOV3 shLUC Vs shAXL #40 (e) Fluorescence intensity quantification of  $\gamma$ H2AX in HeyA8 shLUC Vs shAXL #40 (f) Fluorescence intensity quantification of pRPA32 in HeyA8 shLUC Vs shAXL #40 (g) Foci quantification of 53BP1 in HeyA8 shLUC Vs shAXL #40. Data in (c – g) represent mean  $\pm$  s.e.m.; \* $p < 0.05$ , \*\* $p < 0.01$ , \*\*\* $p < 0.001$ , determined by two-tailed t-test with statistical significance with Welch's correction (h) Immunoblot of DDR markers upon AXL inhibition at the indicated time points in HeyA8. Numbers below blots reflect protein band intensity normalised against DMSO

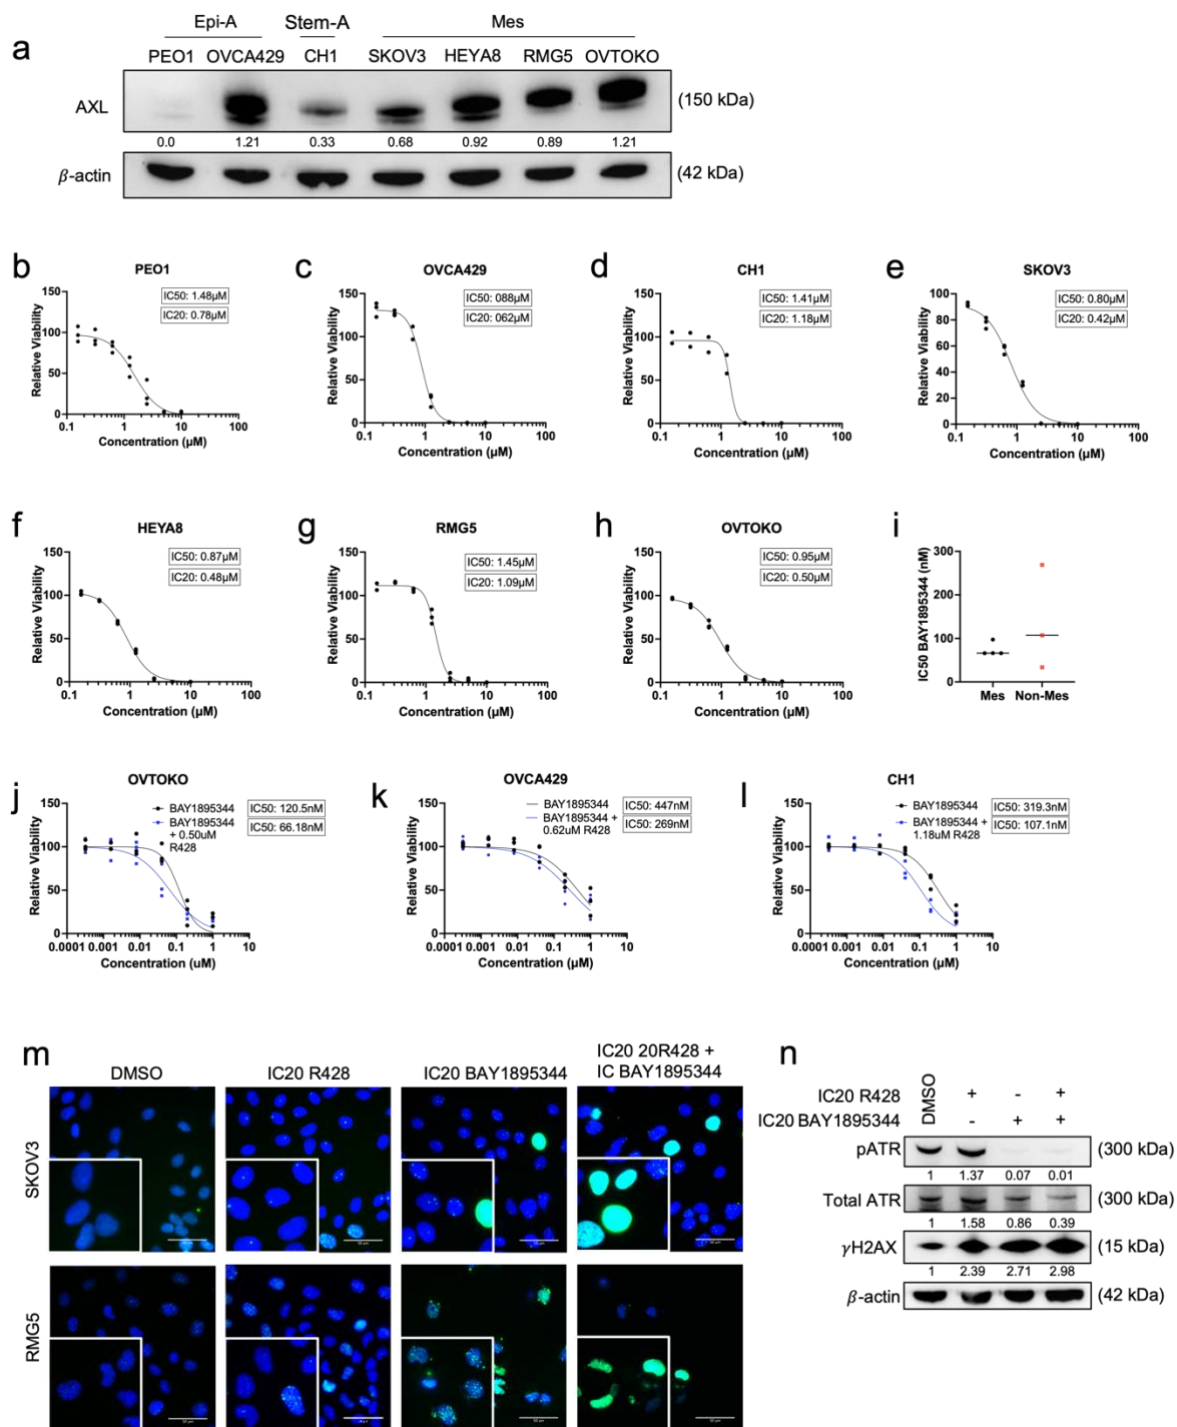

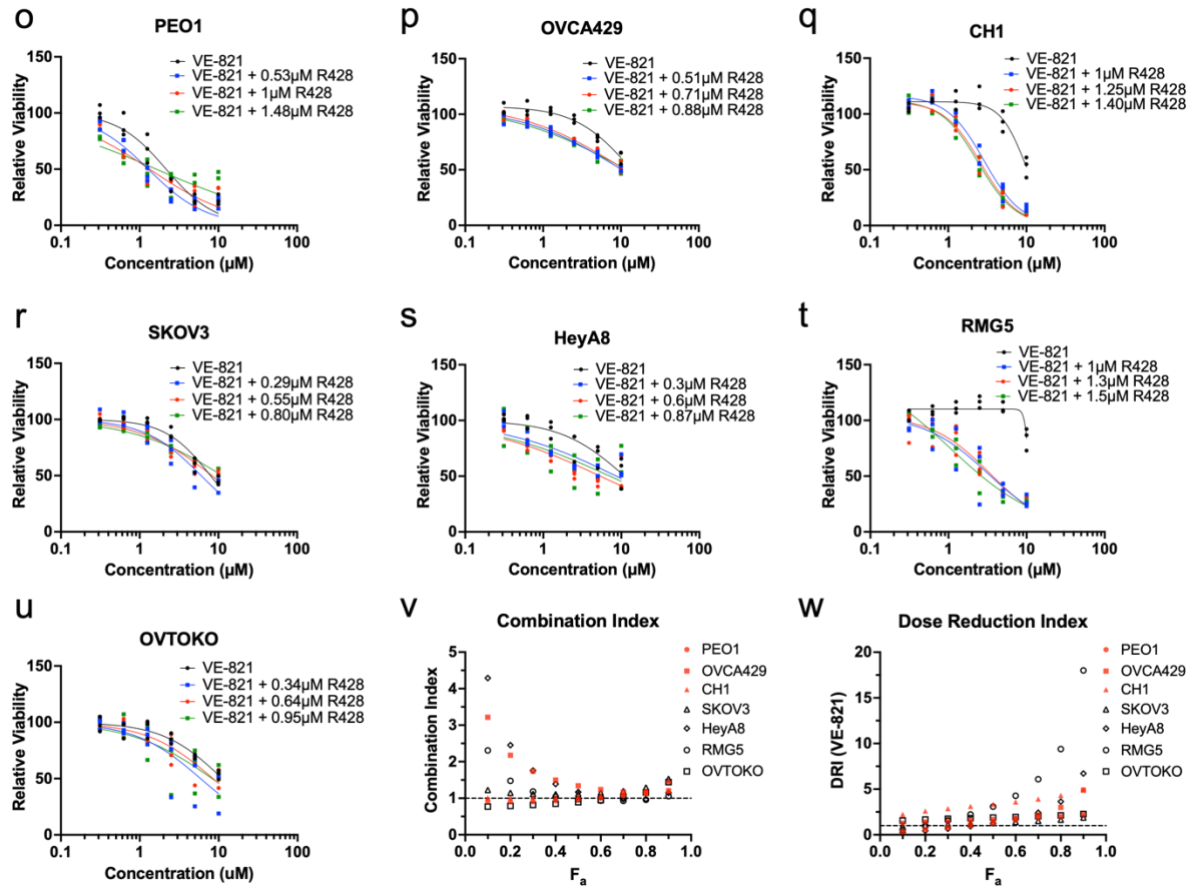

**Supplementary figure 3: AXL inhibition sensitises cells to ATR inhibition**

(a) Immunoblot of AXL expression in a panel of ovarian cancer cell lines. Dose response curves of R428 with respective  $\text{IC}_{50}$  and  $\text{IC}_{20}$  in (b) PEO1 (c) OVCA429 (d) CH1 (e) SKOV3 (f) HeyA8 (g) RMG5 (h) OVTOKO. (i)  $\text{IC}_{50}$  values of BAY1895344 in OC cell lines after sensitization with R428. Combination treatment of R428 with BAY1895344 in (j) OVTOKO (k) OVCA429 (l) CH1. (m) Immunofluorescence staining of  $\gamma\text{H2AX}$  in SKOV3 and RMG5 cell lines treated with combination treatment of AXL and ATR inhibition. Blue, DAPI; Green,  $\gamma\text{H2AX}$ . (n) Immunoblot of DDR markers in SKOV3 treated with combination treatment of AXL and ATR inhibition. Numbers below blots reflect protein band intensity normalised against DMSO. Combination treatment of  $\text{IC}_{10}/\text{IC}_{30}/\text{IC}_{50}$  R428 with VE-821 in (o) PEO1 (p) OVCA429 (q) CH1 (r) SKOV3 (s) HeyA8 (t) RMG5 (u) OVTOKO (v) Combination index of R428 and VE-821 (w) Dose reduction index of VE-821.  $F_a$ : Fraction affected

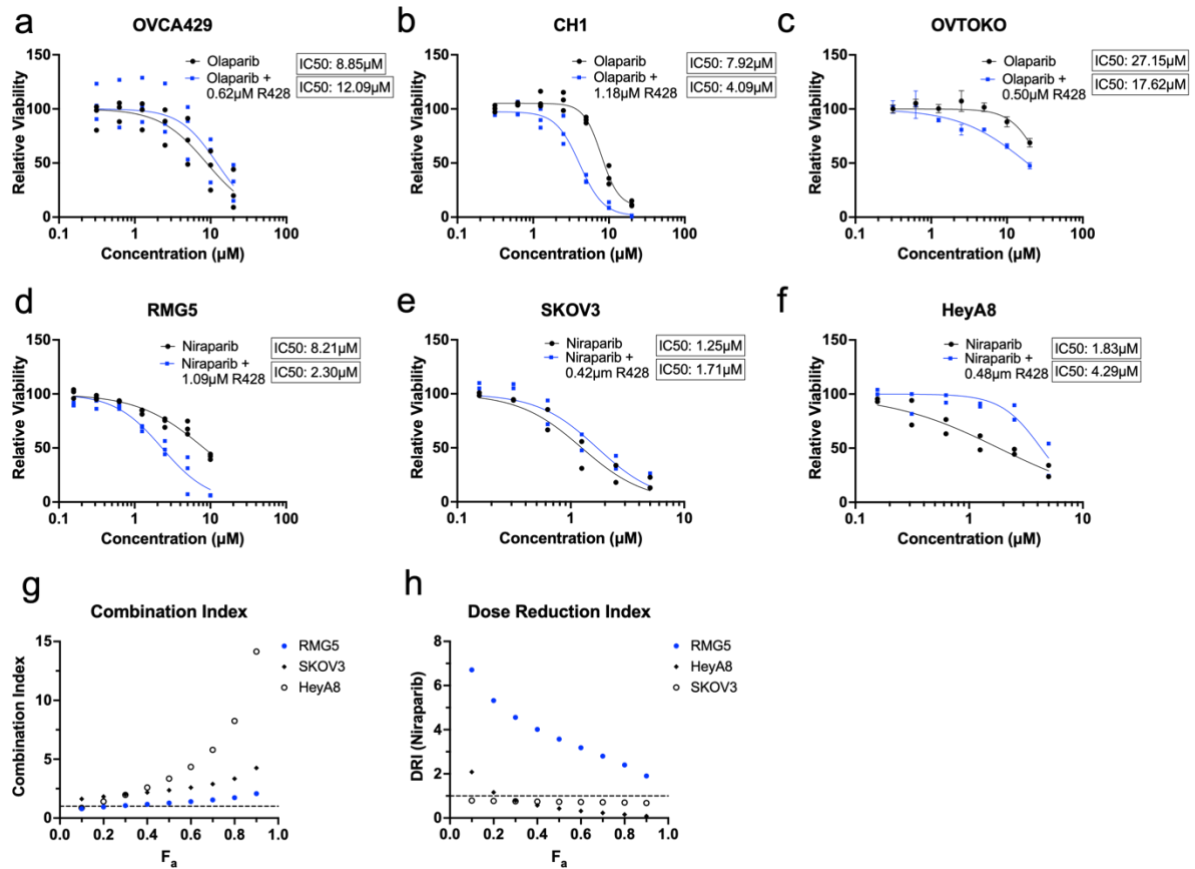

**Supplementary figure 4: AXL inhibition sensitises *BRCA* mutant cells to PARP1 inhibition**

Combination treatment of R428 with Olaparib in (a) OVCA429 (b) CH1 (c) OVTOKO. Combination treatment of R428 with Niraparib in (d) RMG (e) SKOV3 (f) HeyA8 (e) Combination index of R428 and Niraparib (f) Dose reduction index of Niraparib.  $F_a$ : Fraction affected

a

NER = -2.56  
p-value = 0  
q-value = 0

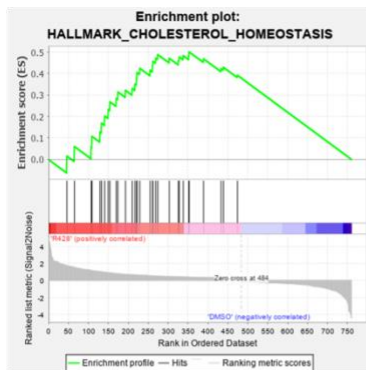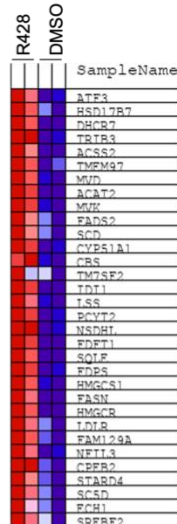

b

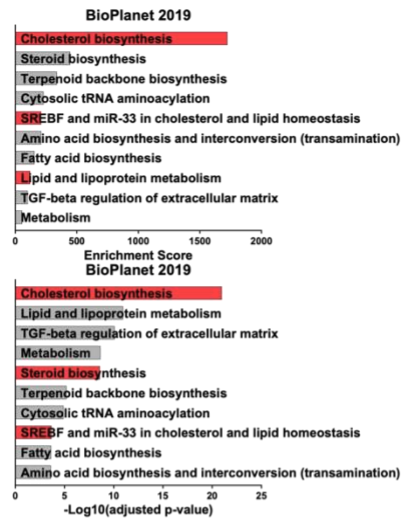

c

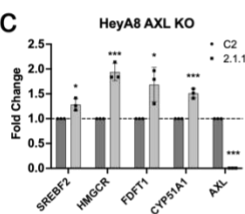

d

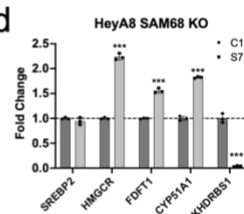

e

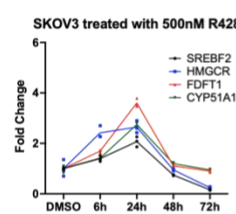

f

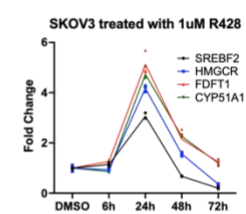

g

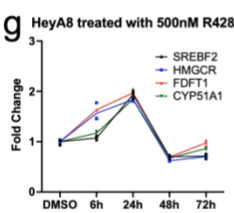

h

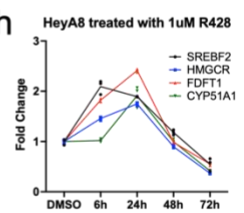

i

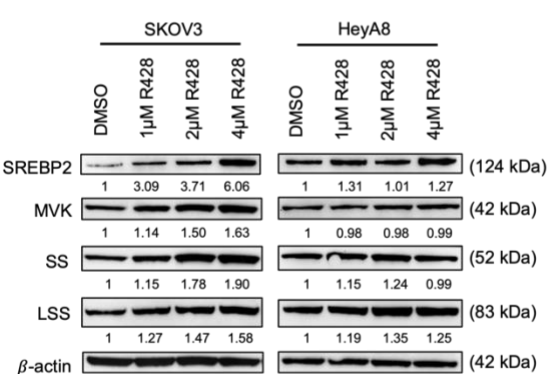

j

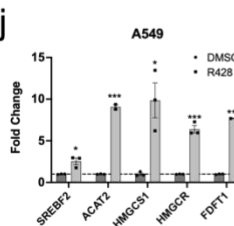

k

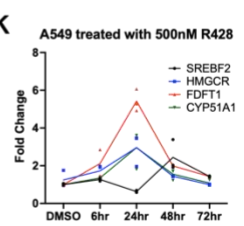

L

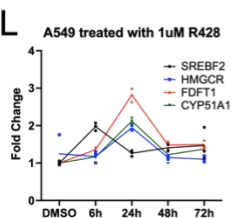

M

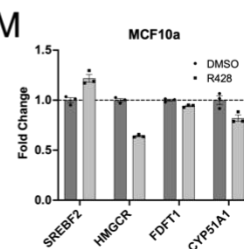

N

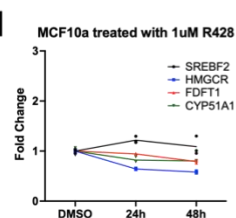

O

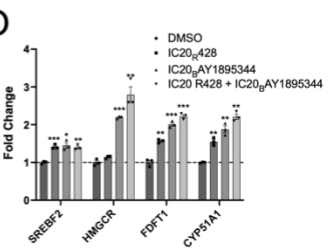

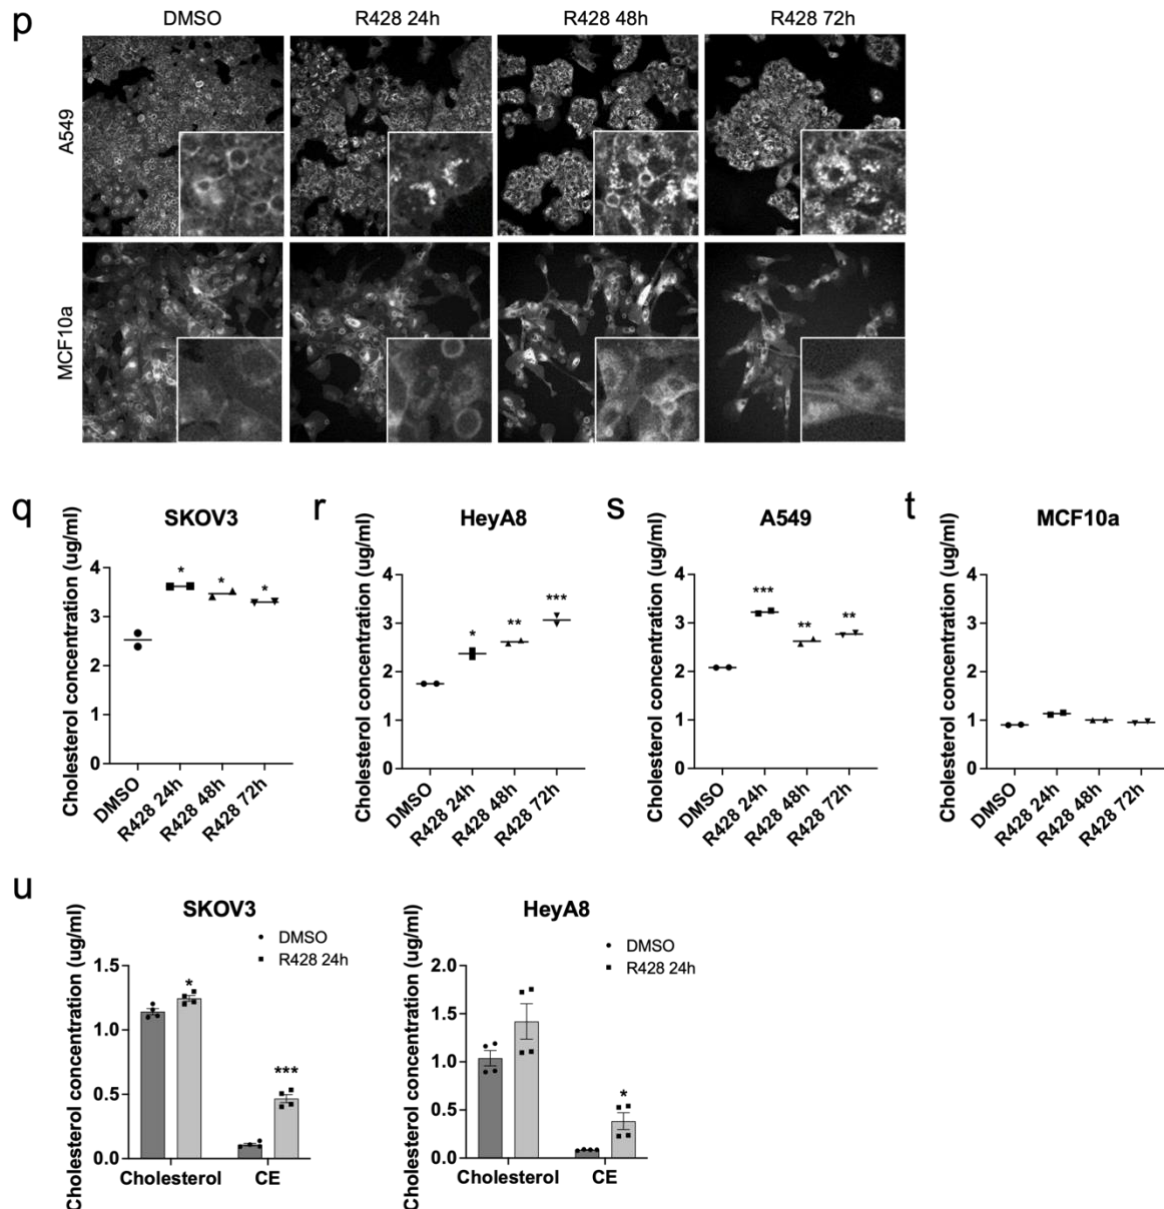

**Supplementary figure 5: AXL KO, SAM68 KO and AXL inhibition increase cholesterol biosynthesis**

(a) GSEA analysis showing positive enrichment of cholesterol homeostasis (b) Top 10 upregulated pathways upon AXL inhibition. Red indicates candidate pathways chosen for validation (c) Relative fold change of cholesterol biosynthesis genes in AXL KO and (d) SAM68 KO (e) Cholesterol biosynthesis genes expression peaked at 24 hrs upon AXL inhibition in a dose- and time-dependent manner in (e & f) SKOV3 and (g & h) HeyA8. (i) Immunoblot of dose-dependent upregulation of cholesterol biosynthesis protein expression levels in SKOV3 and HeyA8. Numbers below blots reflect protein band intensity normalised against DMSO (j) Relative fold change of cholesterol biosynthesis genes in A549 (k & l) Cholesterol biosynthesis genes expression peaked at 24 hrs upon AXL inhibition in a dose- and time-dependent manner in A549 (m) Relative fold change of cholesterol biosynthesis genes in

MCF10a (n) No time-dependent upregulation in expression of cholesterol biosynthesis genes in MCF10a (o) Upregulation of cholesterol biosynthesis genes upon combination treatment with R428 and BAY1895344 (p) Filipin III staining in A549 and MCF10a (q) Quantification of total cholesterol present in SKOV3 (r) HeyA8 (s) A549 (t) MCF10A after AXL inhibition (u) Quantification of free cholesterol and cholesteryl esters present in SKOV3 upon AXL inhibition; \* $p < 0.05$ , \*\* $p < 0.01$ , \*\*\* $p < 0.001$ , determined by two-tailed t-test with Welch's correction

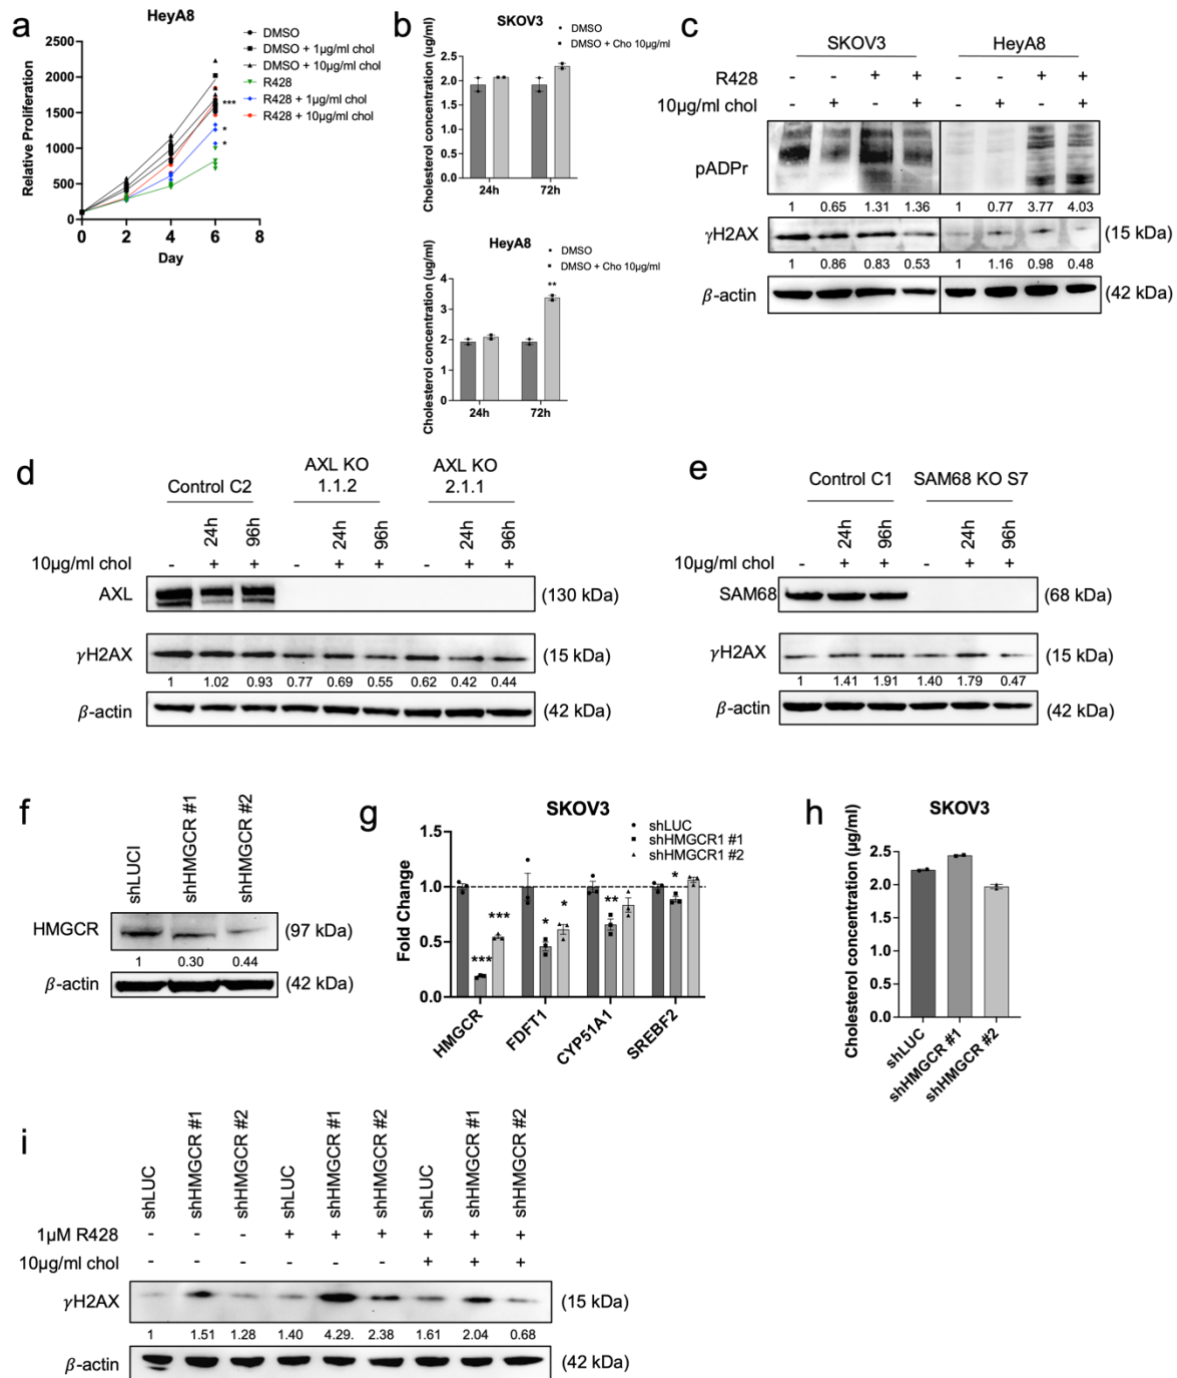

### **Supplementary figure 6: Increased cholesterol mitigates DNA damage induced by AXL inhibition**

(a) Proliferation curve of HeyA8 treated with R428 supplemented with cholesterol; \* $p < 0.05$ , \*\* $p < 0.01$ , \*\*\* $p < 0.001$ , determined by two-tailed t-test with statistical significance with Welch's correction (b) Quantification of total cholesterol in SKOV3 and HeyA8 supplemented with cholesterol (c) Immunoblot of SKOV3 and HeyA8 treated with R428 for 4 days, with and without supplementation of 10 $\mu$ g/ml cholesterol (d) Immunoblot of HeyA8 AXL KO cell lines and (e) SAM68 KO cell lines supplemented with and without supplementation of 10 $\mu$ g/ml cholesterol for 24 hrs and 96 hrs (f) HMGCR knockdown in SKOV3 (shHMGCR) (g) Relative expression levels of cholesterol biosynthesis genes in shHMGCR (h) Quantification of total cholesterol in shHMGCR cell lines; \* $p < 0.05$ , \*\* $p < 0.01$ , \*\*\* $p < 0.001$ , determined by two-tailed t-test with Welch's correction (i) Immunoblot of shHMGCR cell lines treated with R428 with or without supplementation of 10  $\mu$ g/ml cholesterol for 3 days. Numbers below blots reflect protein band intensity normalised against respective controls; Chol: cholesterol

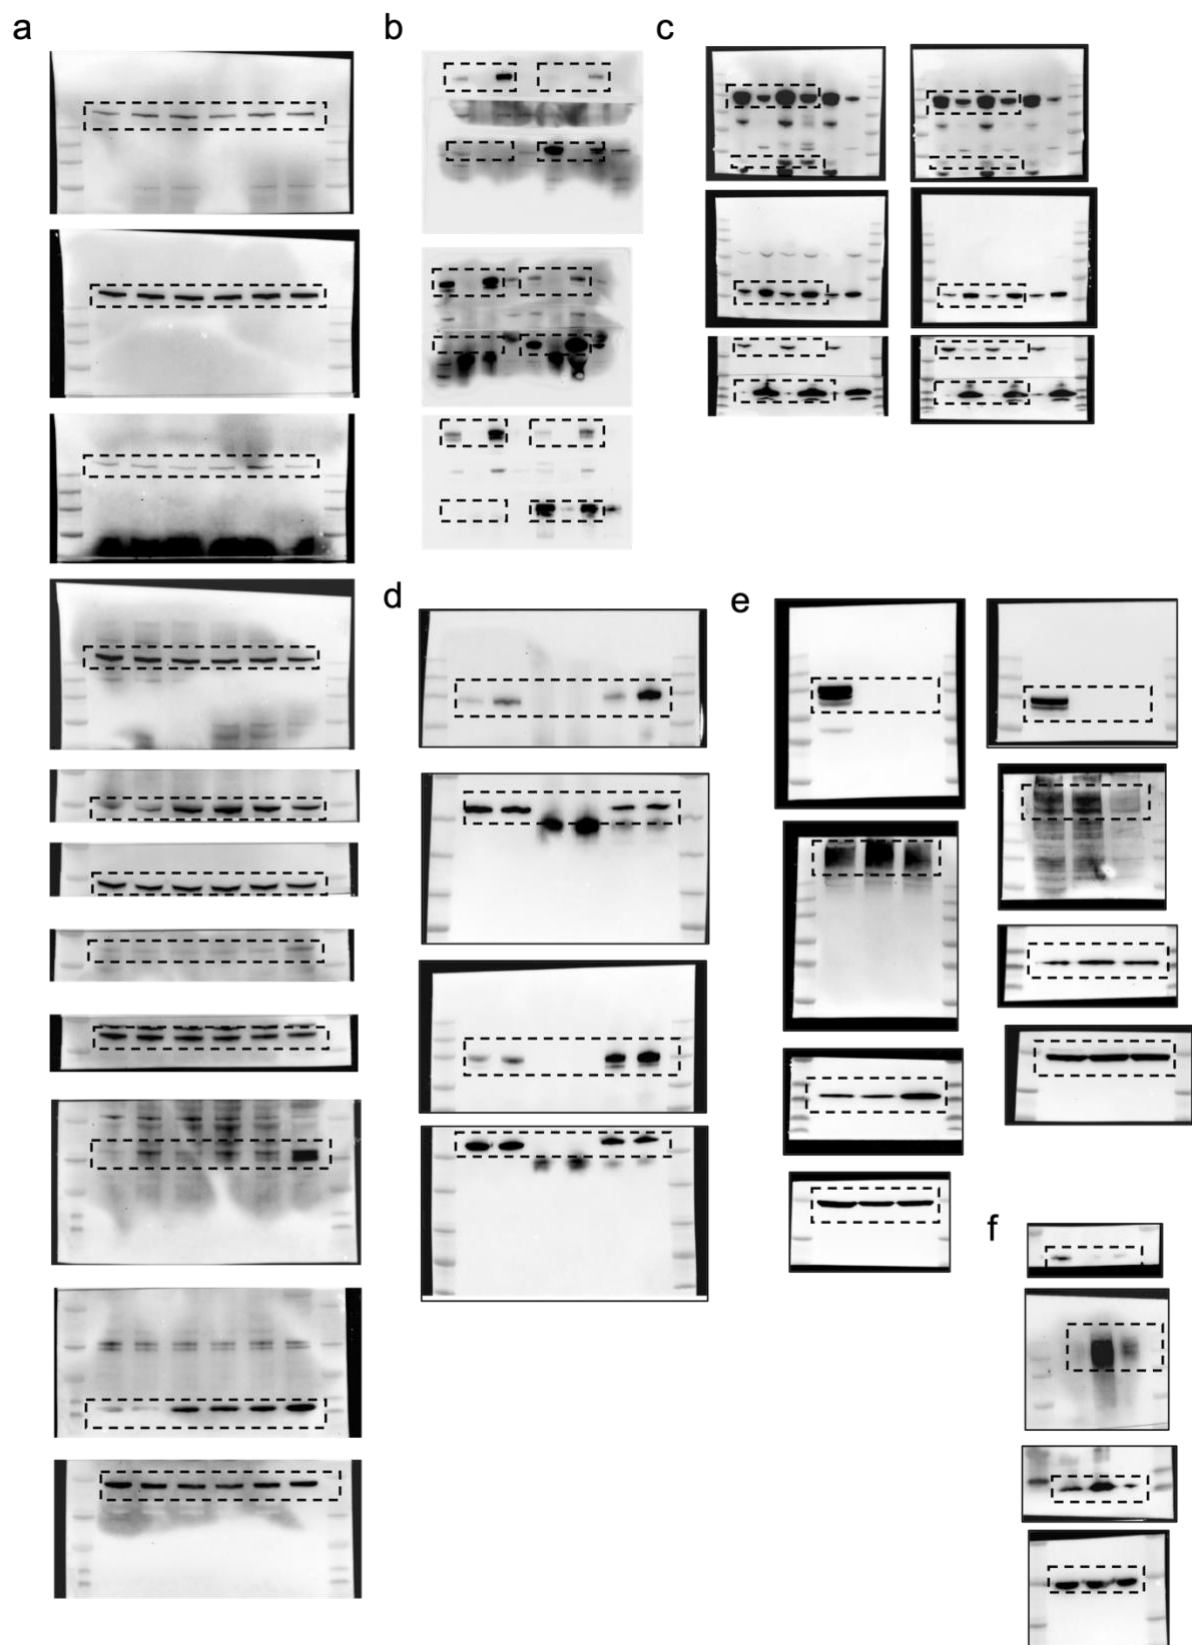

**Supplementary figure 7: Full western blots**

(a) Original full western blots shown in Figure 2e (b) Original full western blots shown in Figure 5b (c) Original full western blots shown in Figure 5c (d) Original full western blots

shown in Figure 5d (e) Original full western blots shown in Figure 6a (f) Original full western blots shown in Figure 6b

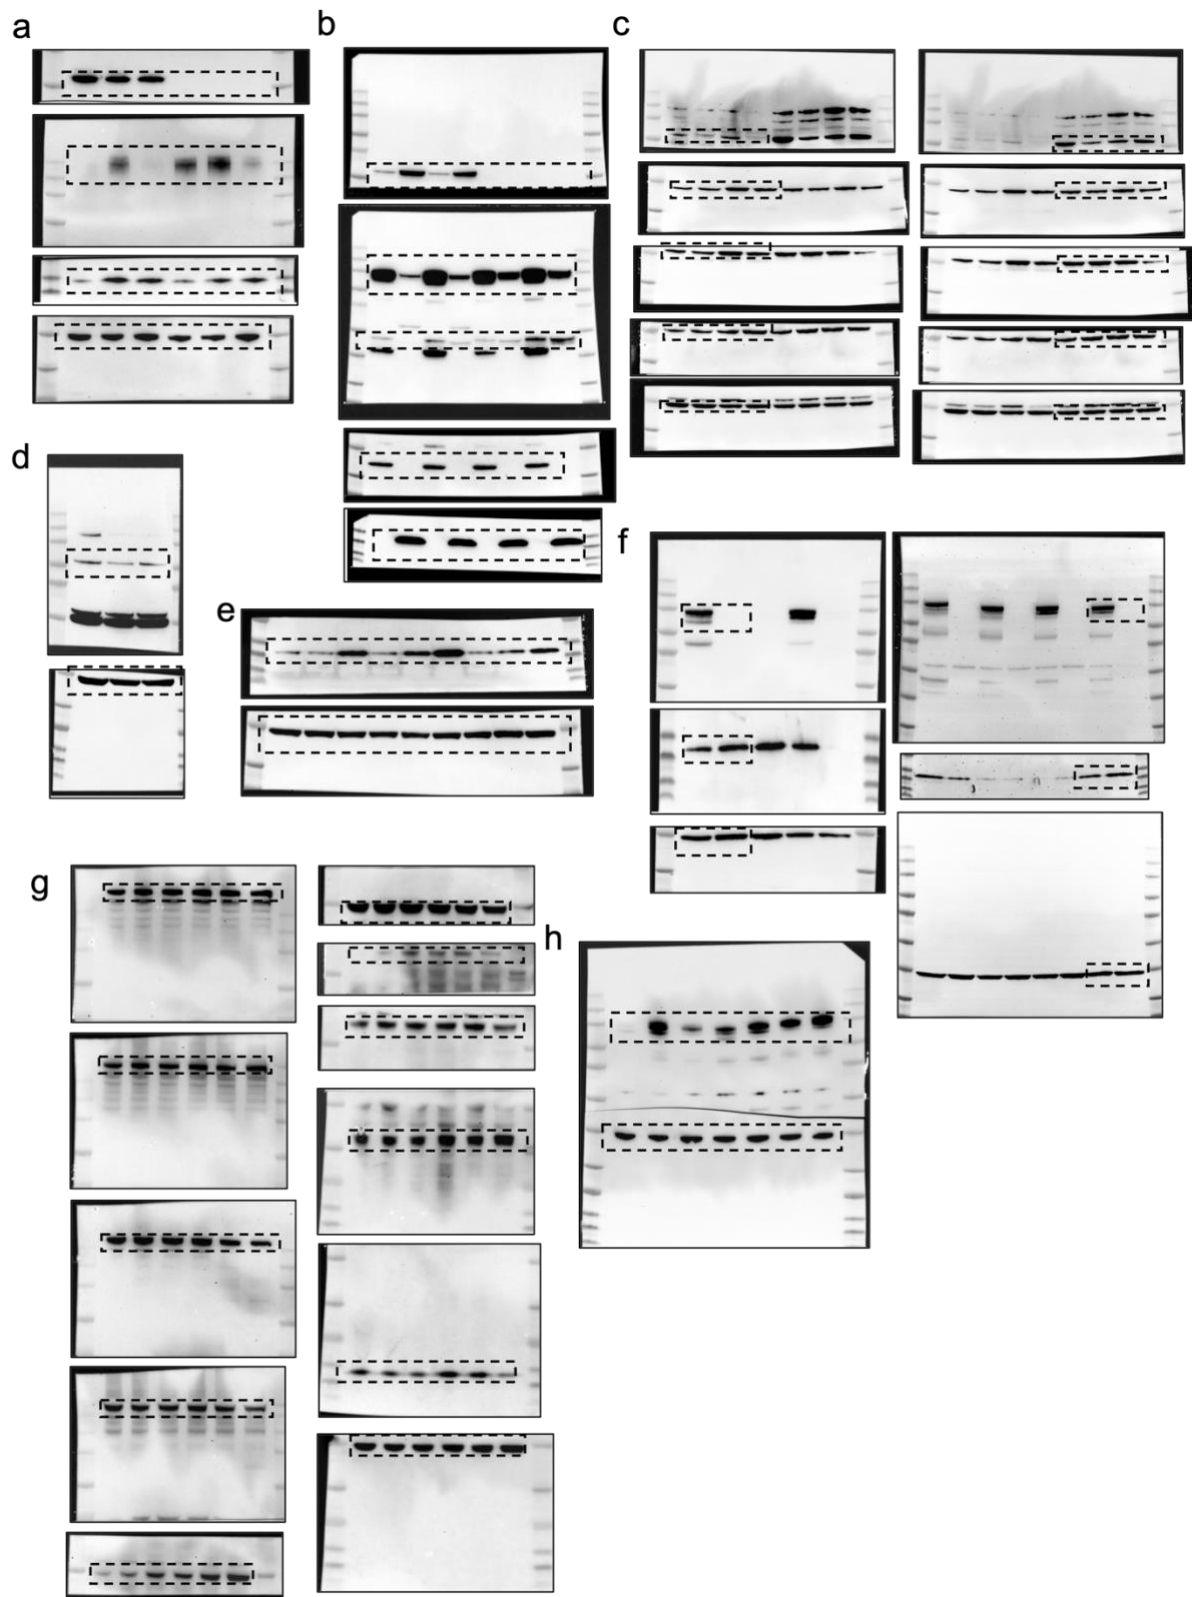

**Supplementary figure 8: Full western blots**

(a) Original full western blots shown in Figure 6c (b) Original full western blots shown in Figure 6d (c) Original full western blots shown in Figure 7f (d) Original full western blots shown in Figure 8b (e) Original full western blots shown in Figure 8e (f) Original full western blots shown in Supp figure 2a (g) Original full western blots shown in Supp figure 2h (h) Original full western blots shown in Supp figure 3a

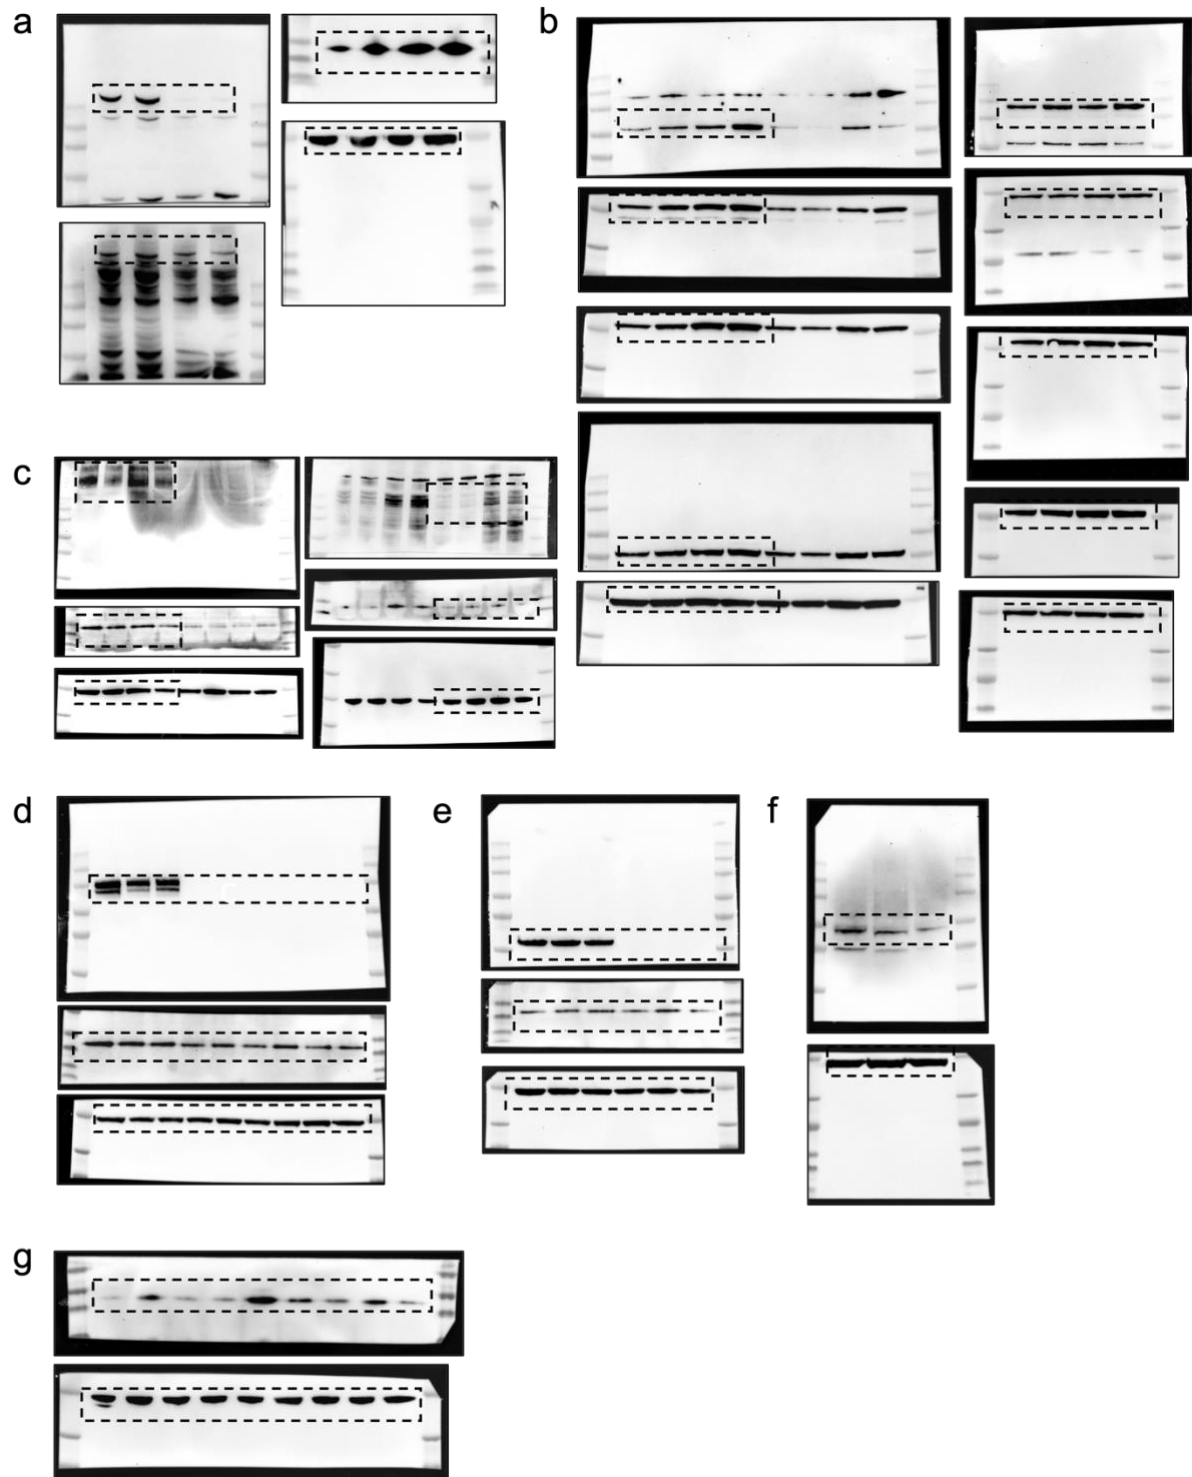

### Supplementary figure 9: Full western blots

(a) Original full western blots shown in Supp figure 3n (b) Original full western blots shown in Supp figure 6i (c) Original full western blots shown in Supp figure 7c (d) Original full

western blots shown in Supp figure 7d (e) Original full western blots shown in Supp figure 7e  
(f) Original full western blots shown in Supp figure 7f (g) Original full western blots shown  
in Supp figure 7i

## Supplementary Tables

**Supplementary Table 1: List of shRNA sequences**

| Target Gene | shRNA ID   | Target sequences      |
|-------------|------------|-----------------------|
| Luciferase  | shLUC      | CGCTGAGTACTTCGAAATGTC |
| AXL         | shAXL#40   | CGAAATCCTCTATGTCAACAT |
| SREBF2      | shSREBF2#1 | CCTGAGTTTCTCTCTCCTGAA |
| SREBF2      | shSREBF2#2 | GCAACAACAGACGGTAATGAT |
| HMGCR       | shHMGCR#1  | ATCAACTTGTGTACTGATAAA |
| HMGCR       | shHMGCR#2  | CAAGTTATTACCCTAAGTTTA |

**Supplementary Table 2: List of CRISPR knockout sgRNA sequences**

| Gene         | sgRNA ID       | sgRNA sequence       |
|--------------|----------------|----------------------|
| AXL Exon 1   | 1.1.2          | GCGTGGCGGTGCCCCAGGAT |
| AXL Exon 2   | 2.1.22 / 2.1.1 | GCTGAAGAAAGTCCCTTCGT |
| SAM68 Exon 5 | S7             | TGAACCCTCTCGTGGACGTG |
| SAM68 Exon 6 | S8             | TGGTGTGGACCACCTCGGG  |

**Supplementary Table 3: Sequence of primers used for qPCR**

| Gene   | Forward Primer          | Reverse Primer              |
|--------|-------------------------|-----------------------------|
| GAPDH  | ACAACCTTTGGTATCGTGGAAGG | GCCATCACGCCACAGTTTC         |
| AXL    | GTGGGCAACCCAGGGAATATC   | GTACTGTCCCGTGTCTGGAAAG      |
| SERBF1 | ACAGTGACTTCCCTGGCCTAT   | GCATGGACGGGTACATCTTCA<br>A  |
| SERBF2 | CCTGGGAGACATCGACGAGAT   | TGAATGACCGTTGCACTGAAG       |
| ACAT2  | GCGGACCATCATAGGTTTCCTT  | ACTGGCTTGTCTAACAGGATTC<br>T |
| HMGCS1 | CTCTTGGGATGGACGGTATGC   | GCTCCAACTCCACCTGTAGG        |
| HMGCR  | TGATTGACCTTTCCAGAGCAAG  | CTAAAATTGCCATTCCACGAGC      |
| FDFT1  | CCACCCCGAAGAGTTCTACAA   | TGCGACTGGTCTGATTGAGATA      |

|         |                       |                            |
|---------|-----------------------|----------------------------|
| FASN    | ACAGCGGGGAATGGGTACT   | GACTGGTACAACGAGCGGAT       |
| CYP51A1 | GAAACGCAGACAGTCTCAAGA | ACGCCCATCCTTGTATGTAGC      |
| KHDRBS1 | TTGGTACGTGGTACACCAGTA | AGGCAAAGGTATCCTCTGGAT<br>G |
